# Supplementary material for: Mapping precision public health definitions, terminology and applications: a scoping review protocol
Source: HighWire-hosted journal article supplement (doi:10.1136/bmjopen-2021-058069), 2022-02-01
Supplement: bmjopen-2021-058069supp001_data_supplement.pdf [file bmjopen-2021-058069supp001_data_supplement.pdf]

## Search Strategy

Alternative terms refer to anything that:

- Authors advocate as an alternative to precision public health
- Authors use interchangeably with precision public health
- Authors use commonly in association with precision public health

### I. CINAHL

| #                                                                                     | Query                        | Limiters/Expanders | Last Run Via                                   | Results |
|---------------------------------------------------------------------------------------|------------------------------|--------------------|------------------------------------------------|---------|
| S5                                                                                    | S1 OR S2 OR S3 OR S4         |                    | Limiters – English Language; Language: English |         |
| Expanders - Also search within the full text of the articles                          |                              |                    |                                                |         |
| Search modes - Find all my search terms      Interface – EBSCOhost Research Databases |                              |                    |                                                |         |
| Search Screen – Advanced Search                                                       |                              |                    |                                                |         |
| Database - CINAHL Plus with Full Text ( <i>insert number of results</i> )             |                              |                    |                                                |         |
| S4                                                                                    | TX "alternative term 3"      |                    | Limiters – English Language; Language: English |         |
| Expanders - Also search within the full text of the articles                          |                              |                    |                                                |         |
| Search modes - Find all my search terms      Interface – EBSCOhost Research Databases |                              |                    |                                                |         |
| Search Screen – Advanced Search                                                       |                              |                    |                                                |         |
| Database - CINAHL Plus with Full Text ( <i>insert number of results</i> )             |                              |                    |                                                |         |
| S3                                                                                    | TX "alternative term 2"      |                    | Limiters – English Language; Language: English |         |
| Expanders - Also search within the full text of the articles                          |                              |                    |                                                |         |
| Search modes - Find all my search terms      Interface – EBSCOhost Research Databases |                              |                    |                                                |         |
| Search Screen – Advanced Search                                                       |                              |                    |                                                |         |
| Database - CINAHL Plus with Full Text ( <i>insert number of results</i> )             |                              |                    |                                                |         |
| S2                                                                                    | TX "alternative term 1"      |                    | Limiters – English Language; Language: English |         |
| Expanders - Also search within the full text of the articles                          |                              |                    |                                                |         |
| Search modes - Find all my search terms      Interface – EBSCOhost Research Databases |                              |                    |                                                |         |
| Search Screen – Advanced Search                                                       |                              |                    |                                                |         |
| Database - CINAHL Plus with Full Text ( <i>insert number of results</i> )             |                              |                    |                                                |         |
| S1                                                                                    | TX "precision public health" |                    | Limiters – English Language; Language: English |         |
| Expanders - Also search within the full text of the articles                          |                              |                    |                                                |         |
| Search modes - Find all my search terms      Interface – EBSCOhost Research Databases |                              |                    |                                                |         |
| Search Screen – Advanced Search                                                       |                              |                    |                                                |         |
| Database - CINAHL Plus with Full Text ( <i>insert number of results</i> )             |                              |                    |                                                |         |

### II. Google Scholar (first 1000 results will be considered)

1. "Precision public health"  
Limiters – English Language  
Expanders – Collections: search articles, results per page: 20, bibliography manager: show links to import citations into Endnote  
Advanced Search – Find articles: with the exact phrase, where my words occur: anywhere in the article
2. "Alternative term 1"  
Limiters – English Language  
Expanders – Collections: search articles, results per page: 20, bibliography manager: show links to import citations into Endnote  
Advanced Search – Find articles: with the exact phrase, where my words occur: anywhere in the article
3. "Alternative term 2"  
Limiters – English Language  
Expanders – Collections: search articles, results per page: 20, bibliography manager: show links to import citations into Endnote  
Advanced Search – Find articles: with the exact phrase, where my words occur: anywhere in the article

## 4. "Alternative term 3"

Limiters – English Language

Expanders – Collections: search articles, results per page: 20, bibliography manager: show links to import citations into Endnote

Advanced Search – Find articles: with the exact phrase, where my words occur: anywhere in the article

## 5. "Precision public health" OR "Alternative term 1" OR "Alternative term 2" OR "Alternative term 3"

Limiters – English Language

Expanders – Collections: search articles, results per page: 20, bibliography manager: show links to import citations into Endnote

Advanced Search – Find articles: with the exact phrase, where my words occur: anywhere in the article

## III. PubMed

Search number Query Filters Results

5 ((("precision public health" AND (english[Filter])) OR ("alternative term 1" AND (english[Filter]))) OR ("alternative term 2" AND (english[Filter]))) OR ("alternative term 3" AND (english[Filter])) English ("precision public health"[All Fields] AND "english"[Language]) OR ("alternative term 1"[All Fields] AND "english"[Language]) OR ("alternative term 2"[All Fields] AND "english"[Language]) OR ("alternative term 3"[All Fields] AND "english"[Language])) AND (english[Filter]) (insert number of results)

4 "alternative term 3" English ("alternative term 3"[All Fields] AND (english[Filter]) (insert number of results))

3 "alternative term 2" English ("alternative term 2"[All Fields] AND (english[Filter]) (insert number of results))

2 "alternative term 1" English ("alternative term 1"[All Fields] AND (english[Filter]) (insert number of results))

1 "precision public health" English ("precision public health"[All Fields] AND (english[Filter]) (insert number of results))

## IV. Scopus

ID Name Query Documents

#5 All search terms  
( ALL ( {precision public health} ) OR ( ALL ( {alternative term 1} ) ) OR ( ALL ( {alternative term 2} ) ) OR ( ALL ( {alternative term 3} ) ) AND ( LIMIT-TO ( LANGUAGE , "English" ) ) ) (insert number of documents)

#4 Alternative term 3  
ALL ( {alternative term 3} ) AND ( LIMIT-TO ( LANGUAGE , "English" ) ) (insert number of documents)

#3 Alternative term 2  
ALL ( {alternative term 2} )  
AND ( LIMIT-TO ( LANGUAGE , "English" ) ) (number of documents)

#2 Alternative term 1  
ALL ( {alternative term 1} ) AND ( LIMIT-TO ( LANGUAGE , "English" ) ) (insert number of documents)

#1 Precision public health  
ALL ( {precision public health} AND ( LIMIT-TO ( LANGUAGE , "English" ) ) ) (insert number of documents)

## V. Web of Science

#5 #4 OR #3 OR #2 OR #1

Search language=Auto

#4 TOPIC: ("alternative term 3")

Search language=Auto  
#3 TOPIC: ("alternative term 2")  
Search language=Auto  
#2 TOPIC: ("alternative term 1")  
Search language=Auto  
#1 TOPIC: ("precision public health")  
Search language=Auto
